# Supplementary material
Source: PubMed Central journal article supplement (PMC8105873)
Supplement: NIHMS1695770-supplement-Supplementary_Material.pdf [file NIHMS1695770-supplement-Supplementary_Material.pdf]

In the format provided by the authors and unedited.

# Cell-type-specific quantification of protein synthesis in vivo

Lorena Hidalgo San **Jose** and Robert A. J. **Signer** <sup>\*</sup>

---

Division of Regenerative Medicine, Department of Medicine, Moores Cancer Center, University of California San Diego, La Jolla, CA, USA.

\*e-mail: [rsigner@ucsd.edu](mailto:rsigner@ucsd.edu)

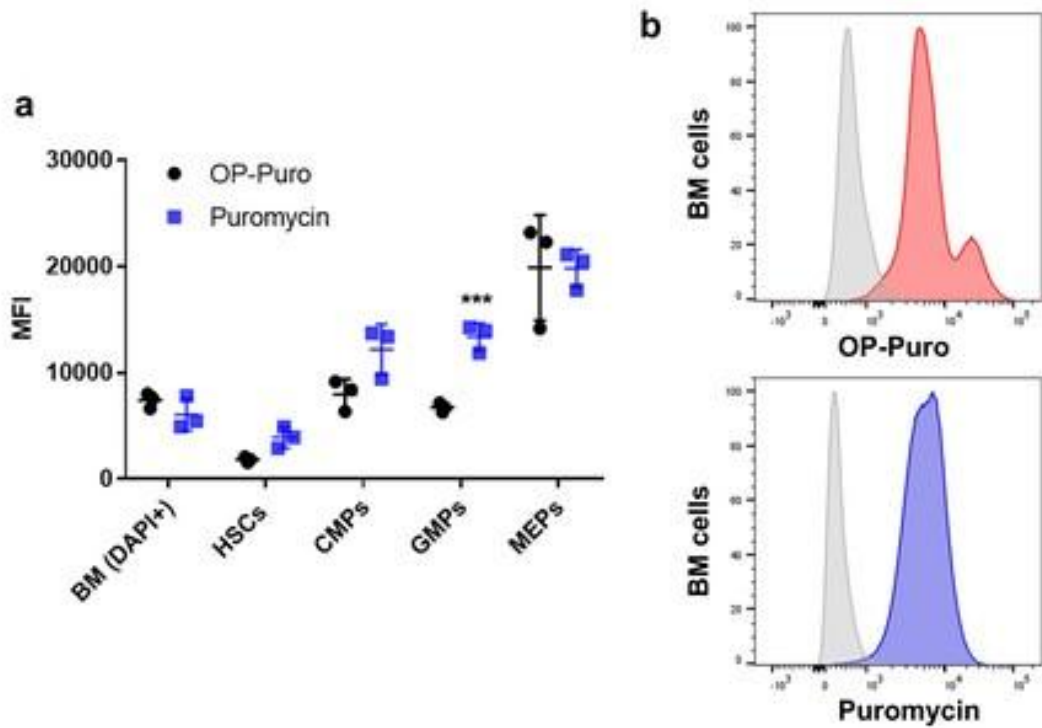

### Supplementary Figure 1

Comparison between OP-Puro and anti-puromycin antibody mediated detection of protein synthesis within mouse bone marrow cells in vivo.

a, MFI of OP-Puro (black) and Puromycin (blue) in unfractionated bone marrow cells, HSCs, CMPs, GMPs, and MEPs ( $n = 3$  for each method). Background fluorescence has been subtracted from each population. Data represent mean  $\pm$  standard deviation. Statistical significance between methods within each cell type was assessed by Student's t-test; \*\*\* $P < 0.001$ . b, Representative histograms show OP-Puro incorporation (red) and puromycin incorporation (blue) in unfractionated bone marrow cells compared to unfractionated bone marrow cells from a PBS injected control mouse (gray). All procedures in this protocol involving mice were approved by the UC San Diego Institutional Animal Care and Use Committee.

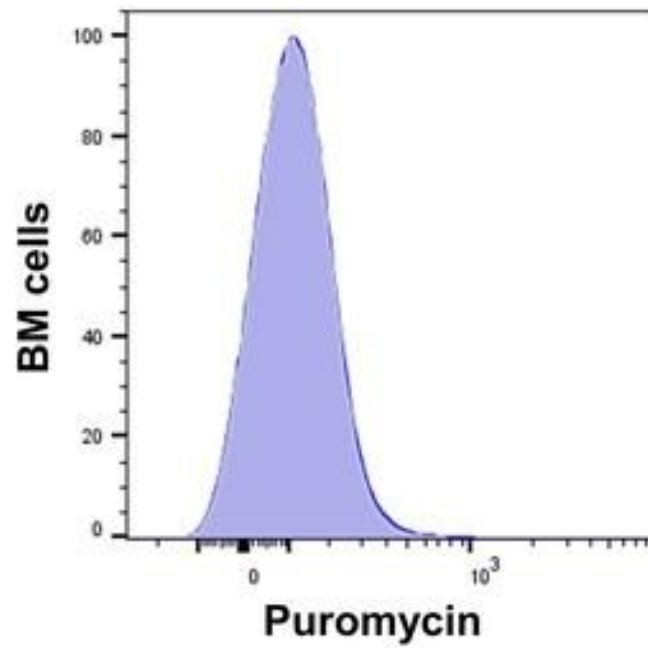

**Supplementary Figure 2**

The SUnSET method cannot be applied to measure protein synthesis *in vivo*.

A representative histogram shows the inability to detect puromycin on the cell surface of unfractionated bone marrow cells (blue). Unfractionated bone marrow cells from a PBS injected control mouse are shown in gray. All procedures in this protocol involving mice were approved by the UC San Diego Institutional Animal Care and Use Committee.

**Supplementary Table 1.** Absolute numbers of each population analyzed in the HSC samples

| Sample | Events  | Cells (DAPI <sup>+</sup> ) | CD150 <sup>+</sup> CD48 <sup>-</sup> Lin <sup>-</sup> | Sca-1 <sup>+</sup> ckit <sup>+</sup> (HSCs) |
|--------|---------|----------------------------|-------------------------------------------------------|---------------------------------------------|
| 1      | 1010438 | 1002022                    | 793                                                   | 72                                          |
| 2      | 1006636 | 997654                     | 297                                                   | 102                                         |
| 3      | 1177230 | 997191                     | 120                                                   | 90                                          |
| 4      | 1001144 | 995282                     | 105                                                   | 77                                          |
| 5      | 1009741 | 987164                     | 113                                                   | 77                                          |

**Supplementary Table 2.** Absolute numbers of each population analyzed in the CMP/GMP/MEP samples

| Sample | Events | Cells (DAPI <sup>+</sup> ) | ckit <sup>+</sup> Lin <sup>-</sup> CD127 <sup>-</sup> | ckit <sup>+</sup> Sca-1 <sup>-</sup> | CD34 <sup>+</sup> CD16/32 <sup>-/low</sup> (CMPs) | CD34 <sup>+</sup> CD16/32 <sup>high</sup> (GMPs) | CD34 <sup>-</sup> CD16/32 <sup>-/low</sup> (MEPs) |
|--------|--------|----------------------------|-------------------------------------------------------|--------------------------------------|---------------------------------------------------|--------------------------------------------------|---------------------------------------------------|
| 1      | 395431 | 391728                     | 2320                                                  | 1620                                 | 562                                               | 799                                              | 156                                               |
| 2      | 393526 | 378851                     | 2453                                                  | 1795                                 | 633                                               | 762                                              | 249                                               |
| 3      | 393846 | 388581                     | 2766                                                  | 2004                                 | 503                                               | 1118                                             | 234                                               |
| 4      | 425000 | 337415                     | 1832                                                  | 1346                                 | 481                                               | 562                                              | 199                                               |
| 5      | 398234 | 361318                     | 1996                                                  | 982                                  | 262                                               | 428                                              | 209                                               |

**Supplementary Table 3.** Frequencies related to parent (%) of each population analyzed in the HSC samples.

| Sample | Events | Cells (DAPI <sup>+</sup> ) | CD150 <sup>+</sup> CD48 <sup>-</sup> Lin <sup>-</sup> | Sca-1 <sup>+</sup> ckit <sup>+</sup> (HSCs) |
|--------|--------|----------------------------|-------------------------------------------------------|---------------------------------------------|
| 1      | 83.6   | 99.2                       | 0.079                                                 | 9.08                                        |
| 2      | 80.6   | 99.1                       | 0.030                                                 | 34.3                                        |
| 3      | 85.3   | 99.3                       | 0.012                                                 | 75.0                                        |
| 4      | 83.5   | 99.4                       | 0.011                                                 | 73.3                                        |
| 5      | 83.2   | 97.8                       | 0.011                                                 | 68.1                                        |

**Supplementary Table 4.** Frequencies related to parent (%) of each population analyzed in the CMP/GMP/MEP samples.

| Sample | Events | Cells (DAPI <sup>+</sup> ) | ckit <sup>+</sup> Lin <sup>-</sup> CD127 <sup>-</sup> | ckit <sup>+</sup> Sca-1 <sup>-</sup> | CD34 <sup>+</sup> CD16/32 <sup>-/low</sup> (CMPs) | CD34 <sup>+</sup> CD16/32 <sup>high</sup> (GMPs) | CD34 <sup>-</sup> CD16/32 <sup>-/low</sup> (MEPs) |
|--------|--------|----------------------------|-------------------------------------------------------|--------------------------------------|---------------------------------------------------|--------------------------------------------------|---------------------------------------------------|
| 1      | 85.0   | 99.1                       | 0.59                                                  | 69.8                                 | 34.7                                              | 49.3                                             | 9.63                                              |
| 2      | 83.2   | 96.3                       | 0.65                                                  | 73.2                                 | 35.3                                              | 42.5                                             | 13.9                                              |
| 3      | 85.5   | 98.7                       | 0.71                                                  | 72.5                                 | 25.1                                              | 55.8                                             | 11.7                                              |
| 4      | 82.2   | 79.5                       | 0.54                                                  | 73.5                                 | 35.7                                              | 41.8                                             | 14.8                                              |
| 5      | 82.6   | 90.7                       | 0.55                                                  | 49.2                                 | 26.7                                              | 43.6                                             | 21.3                                              |
